# Supplementary material
Source: PubMed Central journal article supplement (PMC7967792)
Supplement: dez011_supplementary_table_sii.pdf [file dez011_supplementary_table_sii.pdf]

**Supplementary Table SII**

| <b>Treatment</b>                 | <b>No. of oocytes</b> | <b>No. of 2-cell embryos</b> | <b>No. of blastocysts</b> | <b>Percent oocyte to 2-cell <math>\pm</math> s.d.</b> | <b>Percent 2-cell to blastocyst <math>\pm</math> s.d.</b> | <b>Percent oocyte to blastocyst <math>\pm</math> s.d.</b> |
|----------------------------------|-----------------------|------------------------------|---------------------------|-------------------------------------------------------|-----------------------------------------------------------|-----------------------------------------------------------|
| KSOM/5% O <sub>2</sub>           | 134                   | 64                           | 43                        | 47.8 $\pm$ 17                                         | 67.2 $\pm$ 24                                             | 32.1 $\pm$ 24                                             |
| KSOM/AntiOx<br>5% O <sub>2</sub> | 136                   | 51                           | 30                        | 37.5 $\pm$ 8                                          | 58.8 $\pm$ 22                                             | 22.1 $\pm$ 10                                             |
